# Supplementary material for: New trans-stilbene derivatives with large two-photon absorption cross-section and non-linear optical susceptibility values – a theoretical investigation
Source: Royal Society of Chemistry journal article supplement (doi:10.1039/c5cp01080b), 2015-01-01
Supplement: c5cp01080b1.pdf [file c5cp01080b1.pdf]

## **SUPPLEMENTARY INFORMATION FILE**

# New trans-stilbene derivatives with large two-photon absorption cross-section and non-linear optical susceptibility values - A theoretical investigation

Varun Kundi<sup>a</sup> and Pompozhi Protasis Thankachan<sup>\*a</sup>

<sup>a</sup>Theoretical Chemistry Lab, Department of Chemistry, Indian Institute of Technology Roorkee, Roorkee-247667, India

### **Contents**

Optimized geometry and corresponding Cartesian co-ordinates of the systems studied.

Comparison of previously reported geometries with optimized geometries in present study.

Representation of (a) TSB and (b) TSBD-2 geometries.

Scatter diagram of spatial overlap and TPA values.

### TSBD-1

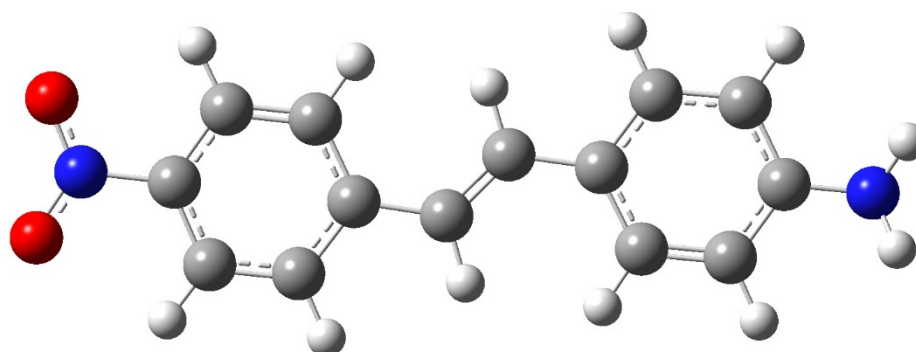

|   |              |              |              |
|---|--------------|--------------|--------------|
| C | -3.150416000 | 1.133353000  | 0.008327000  |
| C | -1.773218000 | 0.979110000  | 0.007255000  |
| C | -1.176186000 | -0.302196000 | -0.001615000 |
| C | -2.035209000 | -1.422948000 | -0.008865000 |
| C | -3.416244000 | -1.285568000 | -0.007824000 |
| C | -3.963561000 | -0.003006000 | 0.000826000  |
| C | 2.673841000  | 0.225543000  | -0.004840000 |
| C | 3.521048000  | 1.351226000  | -0.013742000 |
| C | 3.295674000  | -1.040912000 | 0.005157000  |
| C | 4.903440000  | 1.232649000  | -0.012169000 |
| C | 0.266036000  | -0.525061000 | -0.003006000 |
| C | 1.230464000  | 0.424090000  | -0.004126000 |
| C | 4.674267000  | -1.172632000 | 0.006293000  |
| C | 5.508948000  | -0.036399000 | -0.002344000 |
| H | -3.609780000 | 2.114193000  | 0.015189000  |
| H | -1.150944000 | 1.868011000  | 0.013989000  |
| H | -1.601483000 | -2.419446000 | -0.015772000 |

|   |              |              |              |
|---|--------------|--------------|--------------|
| H | -4.073810000 | -2.146148000 | -0.013569000 |
| H | 0.559426000  | -1.573418000 | -0.004358000 |
| H | 0.927353000  | 1.470489000  | -0.006015000 |
| H | 3.078024000  | 2.344649000  | -0.019511000 |
| H | 2.689414000  | -1.941925000 | 0.015157000  |
| H | 5.525710000  | 2.124559000  | -0.023030000 |
| H | 5.122803000  | -2.163590000 | 0.009654000  |
| N | -5.416763000 | 0.156338000  | 0.002473000  |
| N | 6.890336000  | -0.171425000 | -0.056831000 |
| O | -6.108259000 | -0.864991000 | -0.003839000 |
| O | -5.870186000 | 1.303448000  | 0.010357000  |
| H | 7.427541000  | 0.625463000  | 0.259501000  |
| H | 7.264985000  | -1.048383000 | 0.281171000  |

TSBD-2

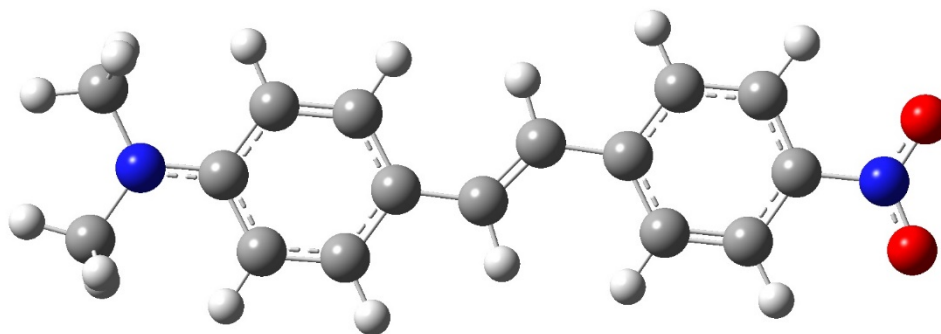

|   |             |              |              |
|---|-------------|--------------|--------------|
| C | 4.033050000 | -1.127766000 | 0.013403000  |
| C | 2.654810000 | -0.985229000 | 0.007987000  |
| C | 2.046376000 | 0.291071000  | -0.006343000 |
| C | 2.896779000 | 1.418875000  | -0.014490000 |

|   |              |              |              |
|---|--------------|--------------|--------------|
| C | 4.278615000  | 1.293121000  | -0.009130000 |
| C | 4.837175000  | 0.015200000  | 0.004824000  |
| C | -1.797140000 | -0.269457000 | -0.017142000 |
| C | -2.639295000 | -1.397892000 | -0.024238000 |
| C | -2.433703000 | 0.988672000  | -0.010664000 |
| C | -4.021956000 | -1.294523000 | -0.027552000 |
| C | 0.603297000  | 0.501786000  | -0.012334000 |
| C | -0.354009000 | -0.455743000 | -0.012631000 |
| C | -3.812187000 | 1.113399000  | -0.014160000 |
| C | -4.654119000 | -0.028366000 | -0.028694000 |
| C | -6.861405000 | -1.095320000 | 0.040413000  |
| C | -6.645539000 | 1.404562000  | 0.059662000  |
| H | 4.500633000  | -2.104743000 | 0.024529000  |
| H | 2.040005000  | -1.879356000 | 0.015733000  |
| H | 2.454695000  | 2.411726000  | -0.025405000 |
| H | 4.928912000  | 2.159272000  | -0.015485000 |
| H | 0.300627000  | 1.547551000  | -0.017710000 |
| H | -0.041998000 | -1.499709000 | -0.010204000 |
| H | -2.191147000 | -2.389368000 | -0.024604000 |
| H | -1.837318000 | 1.896567000  | 0.000911000  |
| H | -4.612619000 | -2.202724000 | -0.028250000 |
| H | -4.242195000 | 2.107855000  | -0.003888000 |
| H | -6.701083000 | -1.650296000 | 0.977023000  |
| H | -7.911329000 | -0.801703000 | -0.005195000 |
| H | -6.668750000 | -1.779300000 | -0.796249000 |

|   |              |              |              |
|---|--------------|--------------|--------------|
| H | -6.342876000 | 2.057146000  | -0.769542000 |
| H | -7.730358000 | 1.294803000  | 0.016442000  |
| H | -6.390401000 | 1.911796000  | 1.002236000  |
| N | 6.290804000  | -0.131861000 | 0.010935000  |
| N | -6.029085000 | 0.092721000  | -0.046257000 |
| O | 6.974244000  | 0.895114000  | 0.003468000  |
| O | 6.754342000  | -1.275098000 | 0.023213000  |

### TSBD-3

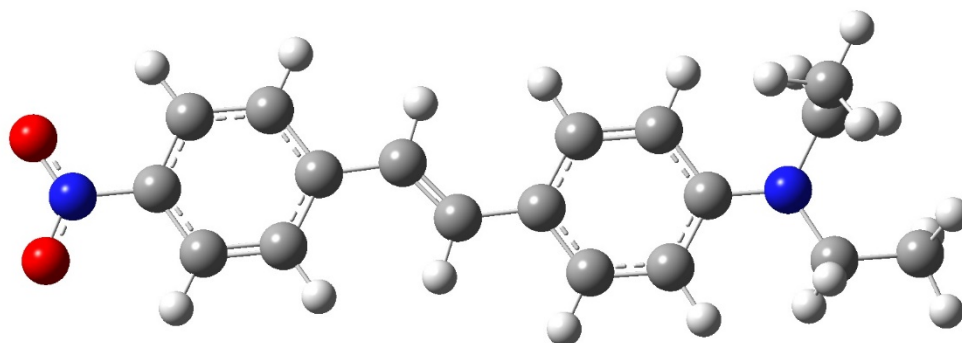

|   |              |              |              |
|---|--------------|--------------|--------------|
| C | -4.810695000 | -1.106180000 | 0.268185000  |
| C | -3.432102000 | -0.975682000 | 0.218743000  |
| C | -2.819987000 | 0.263829000  | -0.078060000 |
| C | -3.666685000 | 1.368550000  | -0.318831000 |
| C | -5.048833000 | 1.254400000  | -0.272963000 |
| C | -5.611411000 | 0.012305000  | 0.020730000  |
| C | 1.019533000  | -0.318242000 | -0.052661000 |
| C | 1.858080000  | -1.434736000 | 0.112597000  |
| C | 1.664211000  | 0.917171000  | -0.268435000 |
| C | 3.241963000  | -1.343635000 | 0.058329000  |

|   |              |              |              |
|---|--------------|--------------|--------------|
| C | -1.376296000 | 0.459178000  | -0.146974000 |
| C | -0.423689000 | -0.489425000 | 0.013899000  |
| C | 3.042078000  | 1.026398000  | -0.325653000 |
| C | 3.887434000  | -0.106335000 | -0.182123000 |
| C | 6.068779000  | -1.218250000 | -0.063554000 |
| C | 5.916417000  | 1.298032000  | -0.137219000 |
| H | -5.281301000 | -2.054826000 | 0.495677000  |
| H | -2.820189000 | -1.849602000 | 0.416826000  |
| H | -3.221256000 | 2.333124000  | -0.547823000 |
| H | -5.696208000 | 2.102485000  | -0.459197000 |
| H | -1.069196000 | 1.482302000  | -0.356633000 |
| H | -0.739782000 | -1.513116000 | 0.211693000  |
| H | 1.409042000  | -2.408374000 | 0.298057000  |
| H | 1.074805000  | 1.821391000  | -0.391617000 |
| H | 3.817304000  | -2.246292000 | 0.216994000  |
| H | 3.465426000  | 2.009295000  | -0.490683000 |
| H | 5.631687000  | -2.015125000 | -0.674303000 |
| H | 5.987795000  | -1.548998000 | 0.986006000  |
| H | 5.404603000  | 2.022472000  | -0.776829000 |
| H | 6.926371000  | 1.224149000  | -0.543311000 |
| N | -7.065375000 | -0.122291000 | 0.072545000  |
| N | 5.270774000  | -0.007121000 | -0.293941000 |
| O | -7.745798000 | 0.882428000  | -0.149856000 |
| O | -7.532417000 | -1.233522000 | 0.335601000  |
| C | 5.971745000  | 1.809552000  | 1.308888000  |

|   |            |             |             |
|---|------------|-------------|-------------|
| H | 4.96686000 | 1.90567600  | 1.73239600  |
| H | 6.54265600 | 1.12590000  | 1.94756400  |
| H | 6.45610900 | 2.79226500  | 1.34873400  |
| C | 7.54535600 | -1.10924400 | -0.44304900 |
| H | 8.10709100 | -0.43371000 | 0.20968500  |
| H | 7.99969200 | -2.10151900 | -0.35070600 |
| H | 7.67102800 | -0.77898500 | -1.47981400 |

### TSBD-4

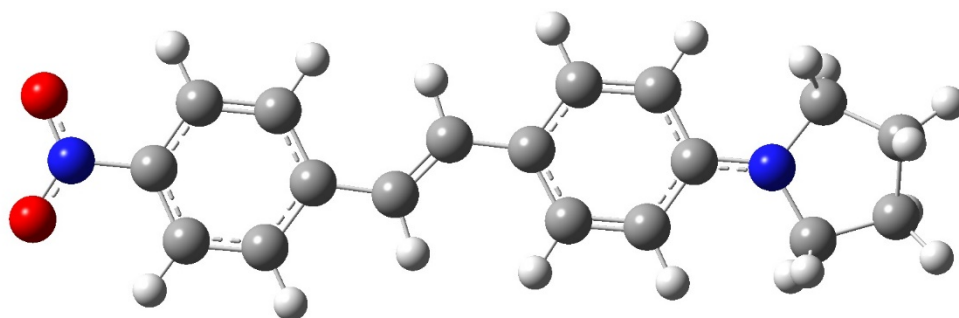

|   |             |             |             |
|---|-------------|-------------|-------------|
| C | -4.80474400 | 1.11431600  | -0.03274600 |
| C | -3.42565800 | 0.98130900  | -0.03102900 |
| C | -2.80797800 | -0.29033800 | 0.00765100  |
| C | -3.65109500 | -1.42336200 | 0.04518200  |
| C | -5.03362600 | -1.30704000 | 0.04406400  |
| C | -5.60161600 | -0.03346900 | 0.00475400  |
| C | 1.03055800  | 0.30065400  | -0.01908100 |
| C | 1.86129400  | 1.43774300  | -0.06877900 |
| C | 1.67858800  | -0.95166700 | 0.03470500  |
| C | 3.24431600  | 1.34815500  | -0.06684400 |
| C | -1.36390000 | -0.49099100 | 0.01096000  |

|   |              |              |              |
|---|--------------|--------------|--------------|
| C | -0.413492000 | 0.473410000  | -0.023946000 |
| C | 3.057784000  | -1.063033000 | 0.039494000  |
| C | 3.885634000  | 0.087859000  | -0.011282000 |
| C | 6.154410000  | 1.131929000  | 0.061978000  |
| C | 5.972042000  | -1.292247000 | -0.054577000 |
| H | -5.278912000 | 2.087678000  | -0.062304000 |
| H | -2.817311000 | 1.879338000  | -0.059986000 |
| H | -3.202263000 | -2.412715000 | 0.075679000  |
| H | -5.677761000 | -2.177263000 | 0.072870000  |
| H | -1.053770000 | -1.533984000 | 0.044903000  |
| H | -0.734318000 | 1.514065000  | -0.060148000 |
| H | 1.401911000  | 2.422971000  | -0.114829000 |
| H | 1.089582000  | -1.863311000 | 0.079843000  |
| H | 3.833804000  | 2.256687000  | -0.119893000 |
| H | 3.505888000  | -2.048990000 | 0.095752000  |
| H | 5.841477000  | 1.830108000  | 0.848117000  |
| H | 6.160320000  | 1.687652000  | -0.889462000 |
| H | 5.578222000  | -1.935155000 | -0.851445000 |
| H | 5.870392000  | -1.842971000 | 0.894236000  |
| N | -7.055781000 | 0.103697000  | 0.003042000  |
| N | 5.253270000  | -0.018514000 | -0.004708000 |
| O | -7.732577000 | -0.927382000 | 0.036412000  |
| O | -7.527493000 | 1.243327000  | -0.031843000 |
| C | 7.524769000  | 0.504445000  | 0.354732000  |
| C | 7.428968000  | -0.877825000 | -0.310339000 |



|   |             |              |              |
|---|-------------|--------------|--------------|
| H | 7.660813000 | 0.394413000  | 1.437091000  |
| H | 8.351066000 | 1.111391000  | -0.026553000 |
| H | 7.607144000 | -0.791136000 | -1.388666000 |
| H | 8.144351000 | -1.601704000 | 0.090517000  |

TSBD-5

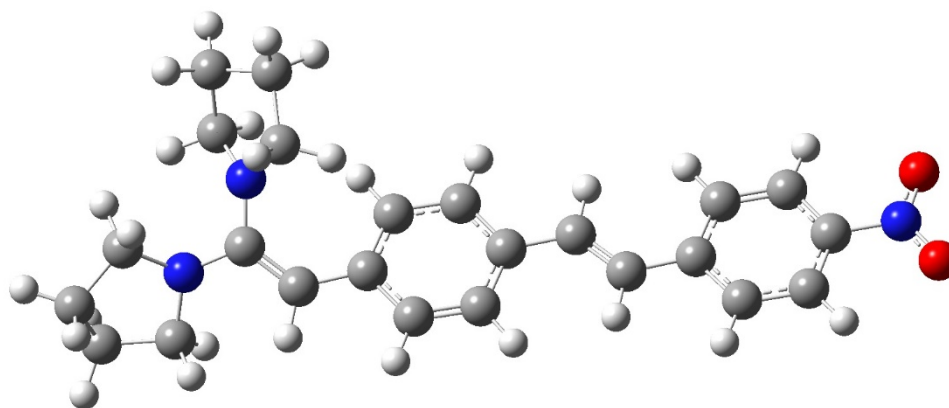

|   |              |              |              |
|---|--------------|--------------|--------------|
| C | 6.667620000  | 0.903364000  | -0.666403000 |
| C | 5.307053000  | 0.662360000  | -0.565381000 |
| C | 4.807890000  | -0.463926000 | 0.129348000  |
| C | 5.750166000  | -1.339257000 | 0.714525000  |
| C | 7.115663000  | -1.111778000 | 0.622386000  |
| C | 7.565065000  | 0.012956000  | -0.069954000 |
| C | 0.933391000  | -0.302449000 | -0.061195000 |
| C | 0.001566000  | 0.623184000  | -0.573731000 |
| C | 0.407877000  | -1.472223000 | 0.531200000  |
| C | -1.366955000 | 0.411297000  | -0.495815000 |
| C | 3.389026000  | -0.767331000 | 0.268069000  |
| C | 2.353994000  | -0.016631000 | -0.180197000 |
| C | -0.956046000 | -1.686997000 | 0.607856000  |

|   |              |              |              |
|---|--------------|--------------|--------------|
| C | -1.899078000 | -0.752625000 | 0.107644000  |
| H | 7.051430000  | 1.764723000  | -1.199226000 |
| H | 4.619794000  | 1.356659000  | -1.037616000 |
| H | 5.392918000  | -2.213452000 | 1.252491000  |
| H | 7.836173000  | -1.783449000 | 1.072664000  |
| H | 3.175235000  | -1.696016000 | 0.794082000  |
| H | 2.577014000  | 0.918677000  | -0.692624000 |
| H | 0.370539000  | 1.526353000  | -1.056257000 |
| H | 1.080287000  | -2.224862000 | 0.933412000  |
| H | -2.041793000 | 1.135795000  | -0.939675000 |
| H | -1.324311000 | -2.600864000 | 1.068740000  |
| N | 8.999780000  | 0.263753000  | -0.176435000 |
| O | 9.767531000  | -0.538915000 | 0.361001000  |
| O | 9.365805000  | 1.264943000  | -0.798153000 |
| C | -3.310027000 | -1.074688000 | 0.183941000  |
| C | -4.404250000 | -0.255778000 | 0.023484000  |
| H | -3.521693000 | -2.124373000 | 0.367206000  |
| C | -6.896988000 | -0.293566000 | 0.352084000  |
| C | -5.822139000 | -2.151097000 | -0.778743000 |
| H | -7.278481000 | 0.592486000  | -0.173127000 |
| H | -6.730239000 | -0.007190000 | 1.397080000  |
| H | -5.499336000 | -2.910439000 | -0.046733000 |
| H | -5.226259000 | -2.293896000 | -1.686206000 |
| N | -5.652767000 | -0.787912000 | -0.270410000 |
| C | -7.881941000 | -1.469907000 | 0.210935000  |

|   |              |              |              |
|---|--------------|--------------|--------------|
| C | -7.334607000 | -2.253208000 | -0.993377000 |
| H | -8.914911000 | -1.133288000 | 0.080233000  |
| H | -7.848497000 | -2.099697000 | 1.108066000  |
| H | -7.685431000 | -3.288865000 | -1.031375000 |
| H | -7.617258000 | -1.762380000 | -1.932418000 |
| C | -3.687270000 | 1.824465000  | 1.254070000  |
| C | -4.971285000 | 2.064764000  | -0.802312000 |
| H | -2.629955000 | 1.549107000  | 1.322799000  |
| H | -4.158085000 | 1.572308000  | 2.214794000  |
| H | -5.925543000 | 1.700908000  | -1.191247000 |
| H | -4.303900000 | 2.212972000  | -1.668476000 |
| N | -4.383298000 | 1.127316000  | 0.161010000  |
| C | -3.854953000 | 3.316233000  | 0.907964000  |
| C | -5.101167000 | 3.358327000  | 0.007353000  |
| H | -2.980465000 | 3.668321000  | 0.347104000  |
| H | -3.945655000 | 3.940735000  | 1.801647000  |
| H | -6.013555000 | 3.326328000  | 0.615493000  |
| H | -5.146336000 | 4.250155000  | -0.625286000 |

TSBD-6

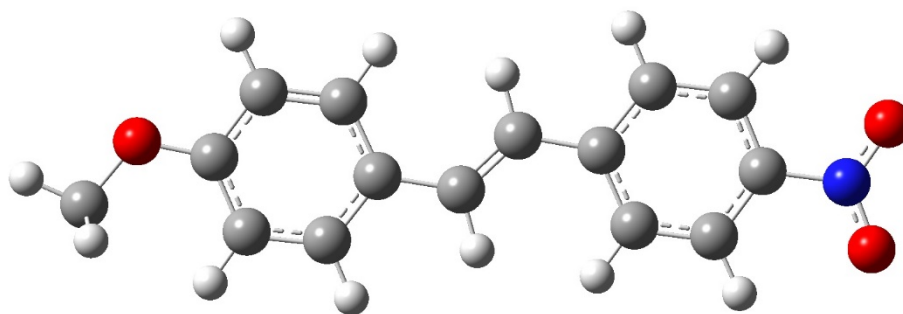

|   |              |              |              |
|---|--------------|--------------|--------------|
| C | 3.588082000  | -1.155999000 | -0.000409000 |
| C | 2.214207000  | -0.972423000 | -0.000394000 |
| C | 1.645737000  | 0.321111000  | 0.000124000  |
| C | 2.526866000  | 1.423713000  | 0.000644000  |
| C | 3.905080000  | 1.256992000  | 0.000631000  |
| C | 4.424304000  | -0.036830000 | 0.000097000  |
| C | -2.216656000 | -0.120254000 | -0.000440000 |
| C | -3.085424000 | -1.223961000 | 0.000093000  |
| C | -2.805517000 | 1.164458000  | -0.001005000 |
| C | -4.471876000 | -1.078643000 | 0.000228000  |
| C | 0.207028000  | 0.574267000  | 0.000162000  |
| C | -0.775904000 | -0.353706000 | -0.000406000 |
| C | -4.178849000 | 1.326667000  | -0.000893000 |
| C | -5.028649000 | 0.205561000  | -0.000230000 |
| C | -7.273249000 | -0.612501000 | 0.001236000  |
| H | 4.026704000  | -2.146285000 | -0.000798000 |
| H | 1.573018000  | -1.847779000 | -0.000783000 |
| H | 2.114243000  | 2.429094000  | 0.001065000  |
| H | 4.580904000  | 2.103308000  | 0.001020000  |
| H | -0.063983000 | 1.628507000  | 0.000729000  |
| H | -0.497151000 | -1.406657000 | -0.000843000 |
| H | -2.665000000 | -2.227021000 | 0.000462000  |
| H | -2.176993000 | 2.049868000  | -0.001603000 |
| H | -5.099924000 | -1.961931000 | 0.000646000  |
| H | -4.628647000 | 2.314560000  | -0.001334000 |

|   |              |              |              |
|---|--------------|--------------|--------------|
| H | -7.153030000 | -1.235747000 | 0.896748000  |
| H | -8.269483000 | -0.167343000 | 0.001662000  |
| H | -7.154386000 | -1.236999000 | -0.893591000 |
| N | 5.875264000  | -0.227090000 | 0.000075000  |
| O | 6.587401000  | 0.779339000  | 0.000435000  |
| O | 6.303514000  | -1.383352000 | -0.000307000 |
| O | -6.361440000 | 0.476933000  | -0.000194000 |

TSBD-7

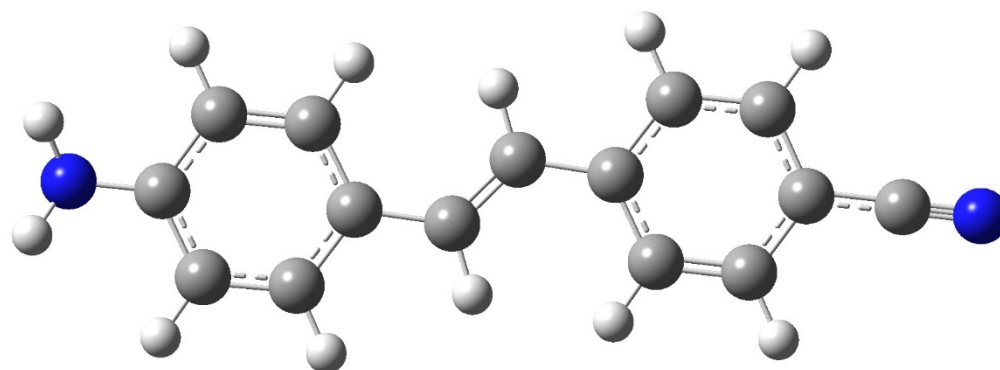

|   |              |              |              |
|---|--------------|--------------|--------------|
| C | 3.624043000  | -1.158209000 | 0.010549000  |
| C | 2.247160000  | -1.001198000 | 0.009109000  |
| C | 1.653695000  | 0.280080000  | -0.001319000 |
| C | 2.516851000  | 1.395681000  | -0.009687000 |
| C | 3.897253000  | 1.251729000  | -0.008256000 |
| C | 4.468519000  | -0.031733000 | 0.001913000  |
| C | -2.200970000 | -0.231742000 | -0.004668000 |
| C | -3.053476000 | -1.352942000 | -0.012705000 |
| C | -2.816947000 | 1.037167000  | 0.003910000  |
| C | -4.435718000 | -1.227733000 | -0.011660000 |

|   |              |              |              |
|---|--------------|--------------|--------------|
| C | 0.210629000  | 0.507307000  | -0.003280000 |
| C | -0.757218000 | -0.436971000 | -0.003337000 |
| C | -4.195328000 | 1.175461000  | 0.004436000  |
| C | -5.035397000 | 0.043684000  | -0.003358000 |
| H | 4.060658000  | -2.151998000 | 0.018678000  |
| H | 1.622246000  | -1.888488000 | 0.016718000  |
| H | 2.087343000  | 2.394210000  | -0.017793000 |
| H | 4.540983000  | 2.125637000  | -0.014962000 |
| H | -0.078381000 | 1.557038000  | -0.006053000 |
| H | -0.459315000 | -1.484977000 | -0.003764000 |
| H | -2.615413000 | -2.348595000 | -0.017309000 |
| H | -2.206569000 | 1.935443000  | 0.013278000  |
| H | -5.061985000 | -2.116916000 | -0.021790000 |
| H | -4.638915000 | 2.168697000  | 0.006615000  |
| N | -6.417337000 | 0.185276000  | -0.059028000 |
| H | -6.955941000 | -0.608597000 | 0.262787000  |
| H | -6.785765000 | 1.063064000  | 0.283927000  |
| C | 5.890555000  | -0.193620000 | 0.003890000  |
| N | 7.047216000  | -0.326176000 | 0.005663000  |

TSBD-8

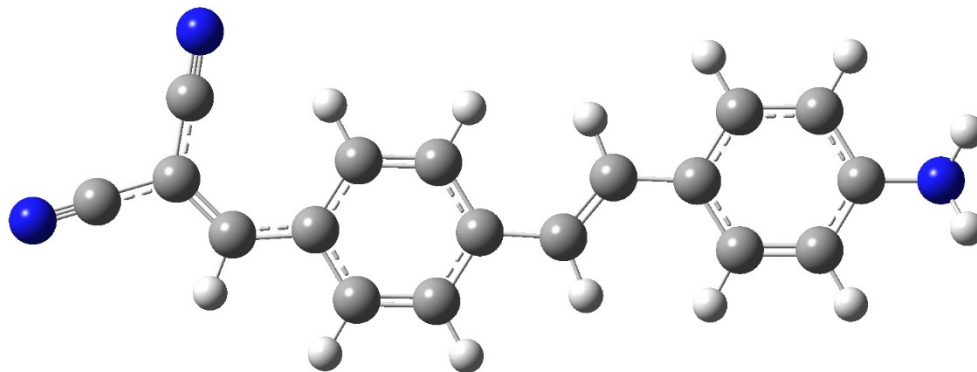

|          |                     |                     |                     |
|----------|---------------------|---------------------|---------------------|
| <b>C</b> | <b>-2.313961000</b> | <b>0.552799000</b>  | <b>-0.000705000</b> |
| <b>C</b> | <b>-0.932324000</b> | <b>0.524849000</b>  | <b>-0.001243000</b> |
| <b>C</b> | <b>-0.211272000</b> | <b>-0.693346000</b> | <b>-0.002815000</b> |
| <b>C</b> | <b>-0.965247000</b> | <b>-1.887131000</b> | <b>-0.003856000</b> |
| <b>C</b> | <b>-2.348716000</b> | <b>-1.865544000</b> | <b>-0.003416000</b> |
| <b>C</b> | <b>-3.066741000</b> | <b>-0.647635000</b> | <b>-0.001672000</b> |
| <b>C</b> | <b>3.565153000</b>  | <b>0.200010000</b>  | <b>-0.004641000</b> |
| <b>C</b> | <b>4.300867000</b>  | <b>1.402431000</b>  | <b>-0.012040000</b> |
| <b>C</b> | <b>4.305424000</b>  | <b>-1.001828000</b> | <b>0.004081000</b>  |
| <b>C</b> | <b>5.687595000</b>  | <b>1.416702000</b>  | <b>-0.010236000</b> |
| <b>C</b> | <b>1.241102000</b>  | <b>-0.778523000</b> | <b>-0.003175000</b> |
| <b>C</b> | <b>2.111575000</b>  | <b>0.260056000</b>  | <b>-0.004434000</b> |
| <b>C</b> | <b>5.689746000</b>  | <b>-1.000934000</b> | <b>0.005531000</b>  |
| <b>C</b> | <b>6.411889000</b>  | <b>0.210736000</b>  | <b>-0.001685000</b> |
| <b>H</b> | <b>-2.815937000</b> | <b>1.512430000</b>  | <b>0.000458000</b>  |
| <b>H</b> | <b>-0.397531000</b> | <b>1.469168000</b>  | <b>-0.000331000</b> |
| <b>H</b> | <b>-0.443922000</b> | <b>-2.840984000</b> | <b>-0.005267000</b> |
| <b>H</b> | <b>-2.898628000</b> | <b>-2.803647000</b> | <b>-0.004392000</b> |
| <b>H</b> | <b>1.633413000</b>  | <b>-1.793892000</b> | <b>-0.003098000</b> |

|   |              |              |              |
|---|--------------|--------------|--------------|
| H | 1.709635000  | 1.272312000  | -0.006636000 |
| H | 3.764182000  | 2.348497000  | -0.016852000 |
| H | 3.788273000  | -1.956817000 | 0.012669000  |
| H | 6.221944000  | 2.363846000  | -0.019775000 |
| H | 6.231560000  | -1.944080000 | 0.008103000  |
| N | 7.797683000  | 0.208802000  | -0.054580000 |
| H | 8.260124000  | 1.054562000  | 0.251951000  |
| H | 8.259040000  | -0.629888000 | 0.272262000  |
| C | -4.507549000 | -0.732600000 | -0.000922000 |
| C | -5.480161000 | 0.235272000  | 0.002229000  |
| H | -4.895649000 | -1.749021000 | -0.003086000 |
| C | -5.244041000 | 1.645781000  | 0.005936000  |
| N | -5.070726000 | 2.797306000  | 0.009144000  |
| C | -6.857581000 | -0.160636000 | 0.002275000  |
| N | -7.974248000 | -0.489716000 | 0.002397000  |

### TSBD-9

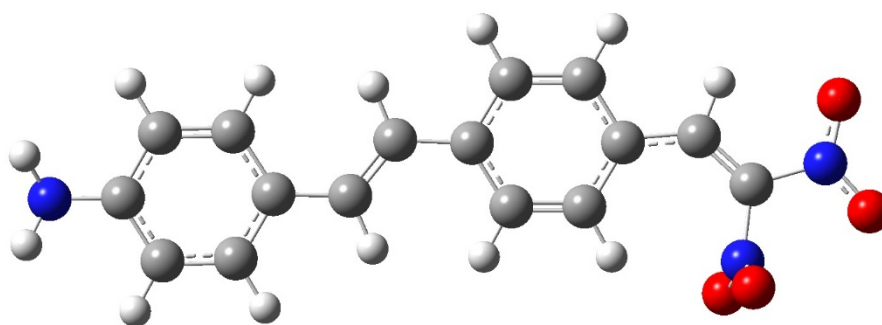

|   |              |              |              |
|---|--------------|--------------|--------------|
| C | 1.558611000  | -0.426838000 | -0.151491000 |
| C | 0.176942000  | -0.425071000 | -0.128119000 |
| C | -0.565893000 | 0.776041000  | -0.031308000 |



|   |              |              |              |
|---|--------------|--------------|--------------|
| C | 0.165914000  | 1.981821000  | 0.031784000  |
| C | 1.549357000  | 1.986836000  | 0.006142000  |
| C | 2.287645000  | 0.784856000  | -0.076025000 |
| C | -4.322934000 | -0.192072000 | -0.018487000 |
| C | -5.035281000 | -1.407022000 | -0.081467000 |
| C | -5.085838000 | 0.992235000  | 0.072222000  |
| C | -6.421003000 | -1.449473000 | -0.055392000 |
| C | -2.019054000 | 0.832383000  | -0.000193000 |
| C | -2.869186000 | -0.222081000 | -0.048446000 |
| C | -6.469418000 | 0.963276000  | 0.098648000  |
| C | -7.168099000 | -0.260667000 | 0.035167000  |
| H | 2.072757000  | -1.374157000 | -0.253816000 |
| H | -0.340815000 | -1.376517000 | -0.193684000 |
| H | -0.372202000 | 2.923645000  | 0.101256000  |
| H | 2.083508000  | 2.932224000  | 0.059005000  |
| H | -2.430572000 | 1.837594000  | 0.069993000  |
| H | -2.447411000 | -1.223791000 | -0.118673000 |
| H | -4.480700000 | -2.340160000 | -0.150323000 |
| H | -4.586941000 | 1.955419000  | 0.125771000  |
| H | -6.937216000 | -2.405097000 | -0.109753000 |
| H | -7.029083000 | 1.893518000  | 0.164867000  |
| N | -8.553780000 | -0.284027000 | 0.007611000  |
| H | -8.995183000 | -1.155361000 | 0.270132000  |
| H | -9.026521000 | 0.525627000  | 0.386961000  |
| C | 3.728165000  | 0.903498000  | -0.071586000 |

|   |             |              |              |
|---|-------------|--------------|--------------|
| C | 4.719291000 | -0.007815000 | -0.014057000 |
| H | 4.116694000 | 1.919138000  | -0.091431000 |
| N | 6.116352000 | 0.389354000  | -0.022111000 |
| O | 6.372887000 | 1.594281000  | -0.012631000 |
| O | 6.947276000 | -0.518200000 | -0.060270000 |
| N | 4.553243000 | -1.464004000 | 0.098846000  |
| O | 4.197716000 | -2.068735000 | -0.910474000 |
| O | 4.755578000 | -1.954945000 | 1.201491000  |

### TSBD-10

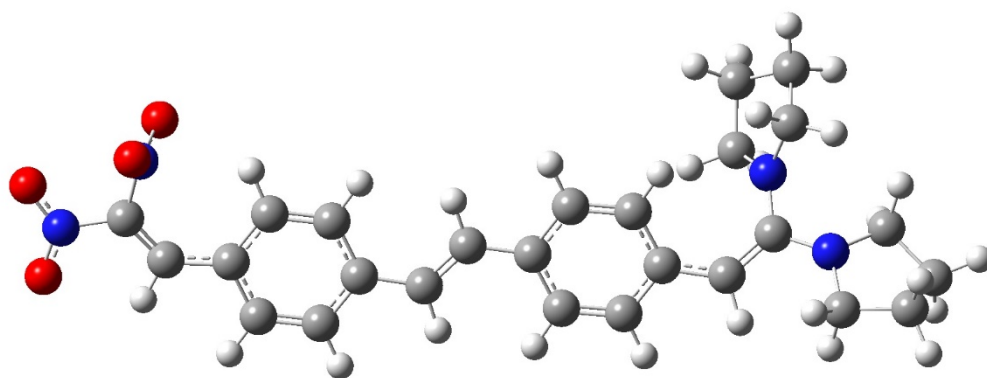

|   |              |              |              |
|---|--------------|--------------|--------------|
| C | -5.101648000 | 0.285816000  | 0.069375000  |
| C | -3.729575000 | 0.128394000  | 0.057210000  |
| C | -3.119775000 | -1.083542000 | -0.351151000 |
| C | -3.979231000 | -2.129555000 | -0.756376000 |
| C | -5.353626000 | -1.977040000 | -0.748503000 |
| C | -5.958755000 | -0.770353000 | -0.327688000 |
| C | 0.712735000  | -0.600831000 | -0.040407000 |
| C | 1.551529000  | 0.454566000  | 0.376441000  |
| C | 1.348711000  | -1.796059000 | -0.448017000 |

|   |               |              |              |
|---|---------------|--------------|--------------|
| C | 2.932800000   | 0.341314000  | 0.377465000  |
| C | -1.684584000  | -1.299903000 | -0.381497000 |
| C | -0.724768000  | -0.410051000 | -0.019688000 |
| C | 2.725500000   | -1.912244000 | -0.445467000 |
| C | 3.575641000   | -0.847408000 | -0.045802000 |
| H | -5.509038000  | 1.243974000  | 0.366469000  |
| H | -3.111885000  | 0.966149000  | 0.364133000  |
| H | -3.546283000  | -3.072202000 | -1.081111000 |
| H | -5.986869000  | -2.802527000 | -1.064056000 |
| H | -1.381832000  | -2.284286000 | -0.733540000 |
| H | -1.037978000  | 0.571961000  | 0.332725000  |
| H | 1.096122000   | 1.381966000  | 0.718517000  |
| H | 0.751983000   | -2.644502000 | -0.771063000 |
| H | 3.532390000   | 1.167910000  | 0.744006000  |
| H | 3.180089000   | -2.847119000 | -0.765566000 |
| C | -7.401501000  | -0.726089000 | -0.338734000 |
| C | -8.291856000  | 0.191109000  | 0.092489000  |
| H | -7.896561000  | -1.604065000 | -0.747379000 |
| N | -9.720569000  | -0.016744000 | -0.040097000 |
| O | -10.107417000 | -1.092429000 | -0.501528000 |
| O | -10.448777000 | 0.916421000  | 0.301622000  |
| N | -7.971800000  | 1.459364000  | 0.762953000  |
| O | -7.533556000  | 2.370031000  | 0.063055000  |
| O | -8.140290000  | 1.498020000  | 1.974735000  |
| C | 5.005487000   | -1.064362000 | -0.037899000 |

|   |              |              |              |
|---|--------------|--------------|--------------|
| C | 6.032192000  | -0.148832000 | 0.053363000  |
| H | 5.300361000  | -2.108732000 | -0.085385000 |
| C | 8.534599000  | -0.025301000 | -0.169985000 |
| C | 7.544704000  | -1.826252000 | 1.121823000  |
| H | 8.842374000  | 0.922563000  | 0.292372000  |
| H | 8.387587000  | 0.164842000  | -1.239159000 |
| H | 7.290295000  | -2.684032000 | 0.477757000  |
| H | 6.935651000  | -1.901848000 | 2.028592000  |
| N | 7.300081000  | -0.546061000 | 0.450844000  |
| C | 9.582321000  | -1.119289000 | 0.103462000  |
| C | 9.054832000  | -1.803887000 | 1.374787000  |
| H | 10.591212000 | -0.710218000 | 0.213299000  |
| H | 9.601543000  | -1.838244000 | -0.724304000 |
| H | 9.468687000  | -2.804372000 | 1.531812000  |
| H | 9.282522000  | -1.197997000 | 2.260056000  |
| C | 5.209794000  | 1.695781000  | -1.453838000 |
| C | 6.399023000  | 2.294580000  | 0.589206000  |
| H | 4.188830000  | 1.309406000  | -1.528738000 |
| H | 5.748948000  | 1.386400000  | -2.360544000 |
| H | 7.375270000  | 2.071337000  | 1.026580000  |
| H | 5.703996000  | 2.479037000  | 1.425528000  |
| N | 5.916055000  | 1.199012000  | -0.261172000 |
| C | 5.218787000  | 3.224817000  | -1.278084000 |
| C | 6.428060000  | 3.491555000  | -0.366781000 |
| H | 4.297745000  | 3.546961000  | -0.776805000 |

|   |            |            |             |
|---|------------|------------|-------------|
| H | 5.27344000 | 3.75094000 | -2.23570600 |
| H | 7.35647400 | 3.47939400 | -0.95088800 |
| H | 6.37049100 | 4.45035400 | 0.15739500  |

TSBD-11

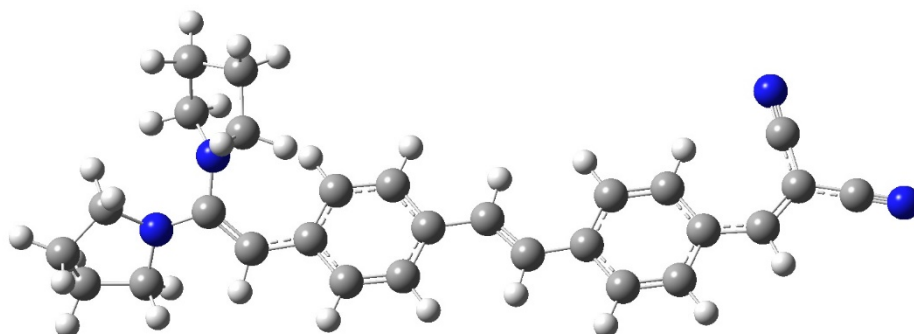

|   |             |             |             |
|---|-------------|-------------|-------------|
| C | 5.89545600  | 0.40177900  | -0.25974000 |
| C | 4.52571000  | 0.22807000  | -0.22118700 |
| C | 3.93763300  | -0.96877500 | 0.25718700  |
| C | 4.81629400  | -1.98467500 | 0.69632900  |
| C | 6.18843200  | -1.81644600 | 0.65981400  |
| C | 6.77309200  | -0.62013100 | 0.18207100  |
| C | 0.09358300  | -0.54780900 | -0.01114100 |
| C | -0.76574200 | 0.47686100  | -0.46078600 |
| C | -0.51962800 | -1.73086000 | 0.46081300  |
| C | -2.14553700 | 0.34659200  | -0.43277100 |
| C | 2.50543800  | -1.20106200 | 0.31964400  |
| C | 1.52862000  | -0.34013800 | -0.06454500 |
| C | -1.89488400 | -1.86390600 | 0.48767900  |
| C | -2.76526200 | -0.82913200 | 0.05519400  |
| H | 6.29222200  | 1.33696900  | -0.63520100 |

|   |              |              |              |
|---|--------------|--------------|--------------|
| H | 3.892921000  | 1.038212000  | -0.568989000 |
| H | 4.399935000  | -2.916692000 | 1.070024000  |
| H | 6.835463000  | -2.619233000 | 1.005454000  |
| H | 2.221029000  | -2.172718000 | 0.719407000  |
| H | 1.822976000  | 0.629535000  | -0.464256000 |
| H | -0.328437000 | 1.393369000  | -0.852286000 |
| H | 0.093534000  | -2.556318000 | 0.811464000  |
| H | -2.761965000 | 1.148304000  | -0.825812000 |
| H | -2.331698000 | -2.788747000 | 0.857864000  |
| C | 8.212569000  | -0.542495000 | 0.186209000  |
| C | 9.076913000  | 0.452790000  | -0.199345000 |
| H | 8.707937000  | -1.434522000 | 0.564129000  |
| C | -4.192862000 | -1.063871000 | 0.083162000  |
| C | -5.232822000 | -0.166855000 | -0.027232000 |
| H | -4.473038000 | -2.108753000 | 0.181590000  |
| C | -7.728945000 | -0.073705000 | 0.260603000  |
| C | -6.746311000 | -1.907361000 | -0.988777000 |
| H | -8.058167000 | 0.859215000  | -0.216703000 |
| H | -7.557836000 | 0.144472000  | 1.321022000  |
| H | -6.470077000 | -2.734749000 | -0.314336000 |
| H | -6.153953000 | -2.014830000 | -1.903325000 |
| N | -6.504541000 | -0.597091000 | -0.378405000 |
| C | -8.771464000 | -1.185974000 | 0.042933000  |
| C | -8.260946000 | -1.911529000 | -1.212474000 |
| H | -9.785813000 | -0.789564000 | -0.063166000 |

|   |              |              |              |
|---|--------------|--------------|--------------|
| H | -8.770443000 | -1.875602000 | 0.895509000  |
| H | -8.666040000 | -2.921775000 | -1.323411000 |
| H | -8.512853000 | -1.342253000 | -2.115324000 |
| C | -4.408507000 | 1.757925000  | 1.375346000  |
| C | -5.651035000 | 2.242957000  | -0.665963000 |
| H | -3.377774000 | 1.396615000  | 1.443638000  |
| H | -4.920777000 | 1.476508000  | 2.306432000  |
| H | -6.629939000 | 1.979806000  | -1.074348000 |
| H | -4.975888000 | 2.405379000  | -1.522920000 |
| N | -5.129038000 | 1.195918000  | 0.221293000  |
| C | -4.454776000 | 3.277677000  | 1.134917000  |
| C | -5.687308000 | 3.479513000  | 0.238011000  |
| H | -3.551049000 | 3.597478000  | 0.601673000  |
| H | -4.502173000 | 3.842984000  | 2.070345000  |
| H | -6.603572000 | 3.473360000  | 0.841110000  |
| H | -5.660824000 | 4.415809000  | -0.327765000 |
| C | 10.487874000 | 0.236749000  | -0.075123000 |
| N | 11.633025000 | 0.053828000  | 0.028863000  |
| C | 8.692036000  | 1.723809000  | -0.729063000 |
| N | 8.397779000  | 2.764165000  | -1.162094000 |

TSBD-12

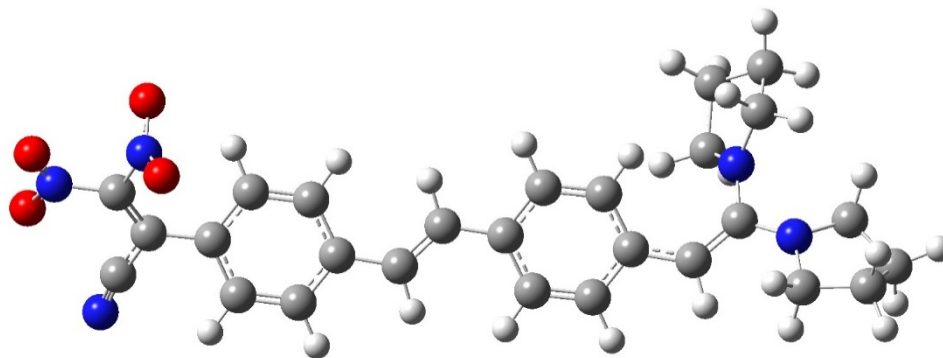

|   |              |              |              |
|---|--------------|--------------|--------------|
| C | -4.767390000 | 0.490101000  | -0.111836000 |
| C | -3.398011000 | 0.315498000  | -0.098607000 |
| C | -2.808521000 | -0.952185000 | -0.325394000 |
| C | -3.687259000 | -2.027333000 | -0.593122000 |
| C | -5.058761000 | -1.857756000 | -0.625739000 |
| C | -5.638476000 | -0.596479000 | -0.363239000 |
| C | 1.025787000  | -0.501799000 | -0.048458000 |
| C | 1.885912000  | 0.587376000  | 0.212243000  |
| C | 1.636960000  | -1.760742000 | -0.256637000 |
| C | 3.263014000  | 0.444642000  | 0.252756000  |
| C | -1.380532000 | -1.197791000 | -0.310408000 |
| C | -0.404642000 | -0.280383000 | -0.076271000 |
| C | 3.009118000  | -1.906522000 | -0.212609000 |
| C | 3.880994000  | -0.811560000 | 0.032461000  |
| H | -5.162004000 | 1.489451000  | 0.028673000  |
| H | -2.770036000 | 1.181885000  | 0.080742000  |
| H | -3.270617000 | -3.013290000 | -0.781212000 |
| H | -5.696953000 | -2.707734000 | -0.842642000 |
| H | -1.094699000 | -2.229159000 | -0.507187000 |



|   |              |              |              |
|---|--------------|--------------|--------------|
| H | -0.700988000 | 0.749640000  | 0.118271000  |
| H | 1.449081000  | 1.566473000  | 0.399055000  |
| H | 1.023203000  | -2.635043000 | -0.453940000 |
| H | 3.878873000  | 1.304204000  | 0.495471000  |
| H | 3.444274000  | -2.889848000 | -0.375433000 |
| C | -7.097304000 | -0.447286000 | -0.387546000 |
| C | -7.810996000 | 0.479243000  | 0.315532000  |
| N | -9.243288000 | 0.666891000  | 0.245470000  |
| O | -9.849391000 | 0.118680000  | -0.673954000 |
| O | -9.748592000 | 1.354685000  | 1.134411000  |
| N | -7.197486000 | 1.372358000  | 1.315137000  |
| O | -7.126116000 | 2.560015000  | 1.014752000  |
| O | -6.802151000 | 0.857844000  | 2.352206000  |
| C | 5.301724000  | -1.059699000 | 0.104286000  |
| C | 6.352202000  | -0.164383000 | 0.086330000  |
| H | 5.569884000  | -2.105977000 | 0.219143000  |
| C | 8.863162000  | -0.146844000 | -0.074644000 |
| C | 7.780306000  | -1.684658000 | 1.461195000  |
| H | 9.185298000  | 0.856948000  | 0.233785000  |
| H | 8.754946000  | -0.135553000 | -1.165053000 |
| H | 7.519250000  | -2.630207000 | 0.958552000  |
| H | 7.142023000  | -1.593723000 | 2.346096000  |
| N | 7.594868000  | -0.526868000 | 0.579925000  |
| C | 9.869391000  | -1.204325000 | 0.414138000  |
| C | 9.281664000  | -1.657146000 | 1.760455000  |

|   |              |              |              |
|---|--------------|--------------|--------------|
| H | 10.884984000 | -0.804911000 | 0.492937000  |
| H | 9.897134000  | -2.050612000 | -0.282671000 |
| H | 9.660390000  | -2.627808000 | 2.093813000  |
| H | 9.499331000  | -0.919717000 | 2.542396000  |
| C | 5.620678000  | 1.433073000  | -1.718036000 |
| C | 6.793726000  | 2.323197000  | 0.224025000  |
| H | 4.575982000  | 1.107855000  | -1.744865000 |
| H | 6.146967000  | 0.925822000  | -2.538418000 |
| H | 7.735806000  | 2.131581000  | 0.742439000  |
| H | 6.078237000  | 2.692031000  | 0.978004000  |
| N | 6.278429000  | 1.117870000  | -0.438143000 |
| C | 5.732133000  | 2.965521000  | -1.825330000 |
| C | 6.929343000  | 3.322626000  | -0.928490000 |
| H | 4.821407000  | 3.433903000  | -1.432586000 |
| H | 5.852455000  | 3.298702000  | -2.860291000 |
| H | 7.872100000  | 3.149525000  | -1.461873000 |
| H | 6.918241000  | 4.362622000  | -0.588518000 |
| C | -7.791309000 | -1.394764000 | -1.219780000 |
| N | -8.189957000 | -2.243764000 | -1.907769000 |

TSBD-13

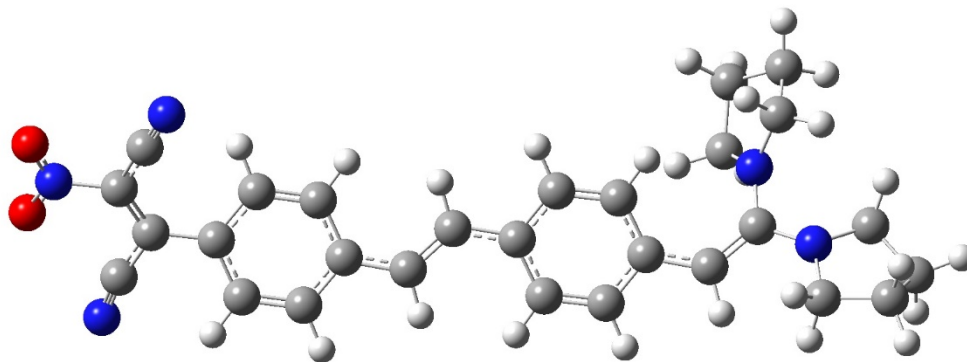

|          |                     |                     |                     |
|----------|---------------------|---------------------|---------------------|
| <b>C</b> | <b>-5.042596000</b> | <b>0.594845000</b>  | <b>0.043744000</b>  |
| <b>C</b> | <b>-3.675983000</b> | <b>0.405546000</b>  | <b>0.029436000</b>  |
| <b>C</b> | <b>-3.103085000</b> | <b>-0.863001000</b> | <b>-0.235539000</b> |
| <b>C</b> | <b>-3.999293000</b> | <b>-1.922304000</b> | <b>-0.512361000</b> |
| <b>C</b> | <b>-5.367840000</b> | <b>-1.737352000</b> | <b>-0.518653000</b> |
| <b>C</b> | <b>-5.935094000</b> | <b>-0.474705000</b> | <b>-0.218902000</b> |
| <b>C</b> | <b>0.736995000</b>  | <b>-0.460049000</b> | <b>0.000036000</b>  |
| <b>C</b> | <b>1.611277000</b>  | <b>0.612184000</b>  | <b>0.285163000</b>  |
| <b>C</b> | <b>1.333517000</b>  | <b>-1.716982000</b> | <b>-0.259564000</b> |
| <b>C</b> | <b>2.987000000</b>  | <b>0.456199000</b>  | <b>0.300418000</b>  |
| <b>C</b> | <b>-1.679720000</b> | <b>-1.124569000</b> | <b>-0.248649000</b> |
| <b>C</b> | <b>-0.690156000</b> | <b>-0.224296000</b> | <b>0.000221000</b>  |
| <b>C</b> | <b>2.704423000</b>  | <b>-1.876157000</b> | <b>-0.240466000</b> |
| <b>C</b> | <b>3.590277000</b>  | <b>-0.797518000</b> | <b>0.028404000</b>  |
| <b>H</b> | <b>-5.422694000</b> | <b>1.590314000</b>  | <b>0.230937000</b>  |
| <b>H</b> | <b>-3.036311000</b> | <b>1.261042000</b>  | <b>0.219417000</b>  |
| <b>H</b> | <b>-3.597196000</b> | <b>-2.908677000</b> | <b>-0.728158000</b> |
| <b>H</b> | <b>-6.015853000</b> | <b>-2.576939000</b> | <b>-0.744094000</b> |
| <b>H</b> | <b>-1.407799000</b> | <b>-2.152348000</b> | <b>-0.480636000</b> |

|   |               |              |              |
|---|---------------|--------------|--------------|
| H | -0.973463000  | 0.801503000  | 0.232345000  |
| H | 1.186125000   | 1.588048000  | 0.511484000  |
| H | 0.708851000   | -2.578479000 | -0.477744000 |
| H | 3.614157000   | 1.301656000  | 0.562581000  |
| H | 3.128276000   | -2.857078000 | -0.442834000 |
| C | -7.388518000  | -0.310760000 | -0.218349000 |
| C | -8.087852000  | 0.665491000  | 0.464452000  |
| N | -9.540697000  | 0.818053000  | 0.334728000  |
| O | -10.130654000 | 0.128460000  | -0.494522000 |
| O | -10.069257000 | 1.645496000  | 1.077156000  |
| C | 5.008603000   | -1.060607000 | 0.068986000  |
| C | 6.067413000   | -0.173663000 | 0.071069000  |
| H | 5.268459000   | -2.112981000 | 0.137326000  |
| C | 8.576481000   | -0.159374000 | -0.117275000 |
| C | 7.502867000   | -1.764757000 | 1.355306000  |
| H | 8.914624000   | 0.819826000  | 0.248383000  |
| H | 8.452472000   | -0.079028000 | -1.202864000 |
| H | 7.220870000   | -2.682781000 | 0.814946000  |
| H | 6.883116000   | -1.707731000 | 2.256085000  |
| N | 7.313208000   | -0.566075000 | 0.530664000  |
| C | 9.576968000   | -1.254461000 | 0.292057000  |
| C | 9.010204000   | -1.768221000 | 1.625460000  |
| H | 10.599813000  | -0.873793000 | 0.369493000  |
| H | 9.576478000   | -2.063111000 | -0.448587000 |
| H | 9.383747000   | -2.758413000 | 1.902203000  |

|   |              |              |              |
|---|--------------|--------------|--------------|
| H | 9.251936000  | -1.073260000 | 2.438578000  |
| C | 5.326396000  | 1.496367000  | -1.661496000 |
| C | 6.527394000  | 2.304450000  | 0.299867000  |
| H | 4.281477000  | 1.172586000  | -1.691612000 |
| H | 5.844881000  | 1.023576000  | -2.507101000 |
| H | 7.476896000  | 2.089194000  | 0.794989000  |
| H | 5.825418000  | 2.645009000  | 1.079280000  |
| N | 5.996027000  | 1.128448000  | -0.401636000 |
| C | 5.438448000  | 3.031531000  | -1.706656000 |
| C | 6.649201000  | 3.349414000  | -0.813428000 |
| H | 4.534288000  | 3.483926000  | -1.281436000 |
| H | 5.544303000  | 3.407291000  | -2.728515000 |
| H | 7.583785000  | 3.196238000  | -1.366858000 |
| H | 6.645801000  | 4.374672000  | -0.431261000 |
| C | -8.095221000 | -1.298294000 | -0.992803000 |
| N | -8.474802000 | -2.190204000 | -1.637188000 |
| C | -7.521604000 | 1.572748000  | 1.399263000  |
| N | -7.041763000 | 2.305187000  | 2.166878000  |

**Table 1: Comparison of previously reported geometries with optimized geometries in present study**

| Parameters                |         | TSBD-2         |                                 | TSB                        |                                 |
|---------------------------|---------|----------------|---------------------------------|----------------------------|---------------------------------|
|                           |         | B3LYP/6-31G(d) | B3LYP/6-311G(d, p) <sup>a</sup> | B3LYP/6-31G(d)             | B3LYP/6-311G(d, p) <sup>a</sup> |
| Bond Length<br>(Angstrom) | C1-C1'  | 1.354          | 1.350                           | 1.349 (1.326) <sup>b</sup> | 1.345                           |
|                           | C1-C2   | 1.458          | 1.458                           | 1.466 (1.471) <sup>b</sup> | 1.465                           |
|                           | C5-N1   | 1.461          | 1.469                           | -----                      | -----                           |
|                           | C5'-N1' | 1.380          | 1.378                           | -----                      | -----                           |
|                           | N1'-C9' | 1.453          | 1.454                           | -----                      | -----                           |
|                           | C1-H1   | 1.089          | 1.086                           | 1.089                      | 1.087                           |
|                           | C3-H2   | 1.085          | 1.083                           | 1.086                      | 1.084                           |

|                   |            |         |         |                              |         |
|-------------------|------------|---------|---------|------------------------------|---------|
|                   | N1-O1      | 1.234   | 1.227   | -----                        | -----   |
| Angle<br>(Degree) | C1'-C1-C2  | 126.686 | 126.689 | 127.166                      | 127.198 |
|                   | C1-C1'-C2' | 127.638 | 127.694 | 127.166 (126.4) <sup>b</sup> | 127.199 |
|                   | C1-C2-C7   | 118.708 | 118.744 | 118.677 (119.0) <sup>b</sup> | 118.705 |
|                   | C6-C5-N1   | 119.387 | 119.392 | -----                        | -----   |

<sup>a</sup> M. M. Alam, M. Chattopadhyaya and S. Chakrabarti, *J. Phys. Chem. A*, 2012, **116**, 11034-11040.

<sup>b</sup> K. Ogawa, J. Harada and S. Tomoda, *Acta Crystallogr.*, 1995, **B51**, 240-248.

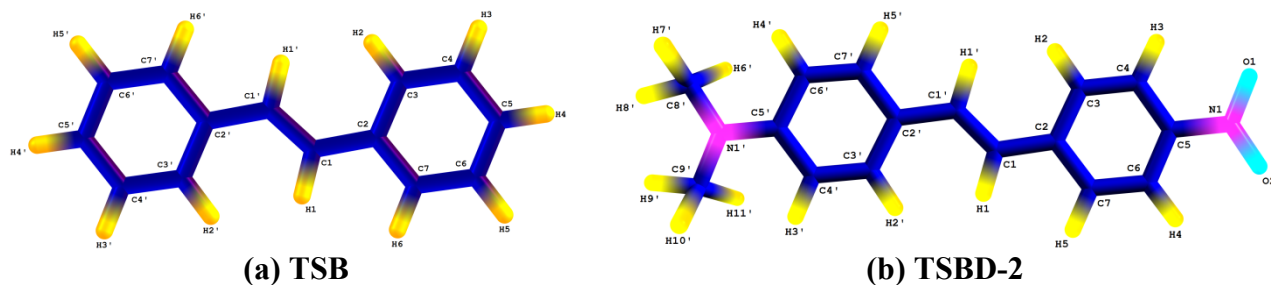

Figure 1. Representation of (a) TSB and (b) TSBD-2 geometries.

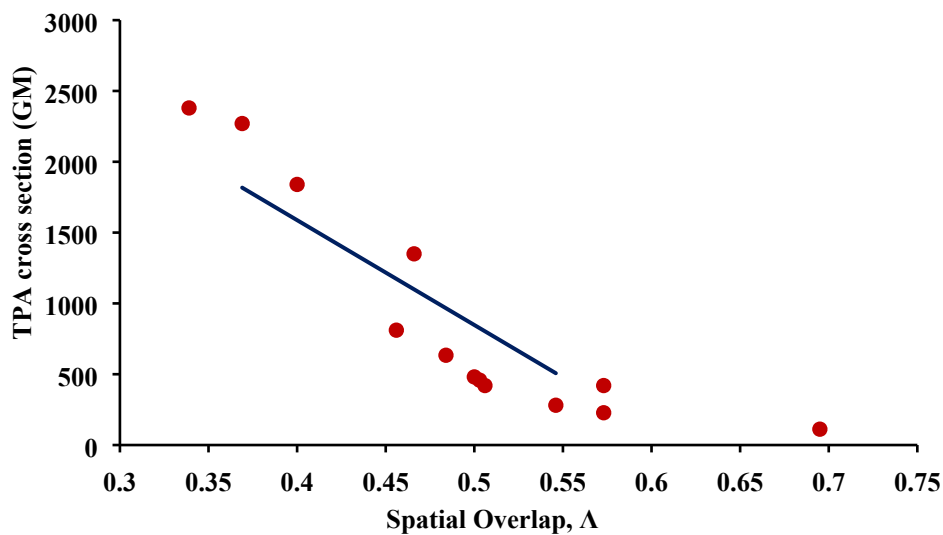

Figure 2. Scatter diagram of spatial overlap and TPA  
Values which appear to have a linear relationship.
